# Ventral hippocampal CA1 and CA3 differentially mediate learned approach-avoidance conflict processing

Anett Schumacher<sup>1</sup>, Franz R. Villaruel<sup>1</sup>, Sadia Riaz<sup>1</sup>, Andy C. H. Lee<sup>1,2</sup>, Rutsuko Ito<sup>1,3</sup>

<sup>1</sup> Department of Psychology (Scarborough), University of Toronto, Canada; <sup>2</sup> Rotman Research Institute, Baycrest Centre, Toronto, Canada; <sup>3</sup> Department of Cell and Systems Biology, University of Toronto, Canada

*Corresponding author:*

Dr Rutsuko Ito  
Department of Psychology  
University of Toronto Scarborough  
1265 Military Trail  
Toronto, Ontario, M1C 1A4  
E-mail: rutsuko.ito@utoronto.ca  
Tel: +1 416 2082907  
Fax: +1 416 2877642

**Grant sponsor:** Natural Science and Engineering Research Council (N.S.E.R.C) of Canada awarded to RI (402642) and ACHL (402651).

## 1 **Abstract**

2 The ventral hippocampus is thought to play a key role in the resolution of approach-avoidance  
3 conflict, a scenario that arises when stimuli with opposing valences are present simultaneously.  
4 Little is known, however, about the contributions of specific hippocampal sub-regions in this  
5 process, a critical issue given the functional and anatomical heterogeneity of this structure. Using  
6 a non-spatial cue-based paradigm in rats, we found that transient pharmacological inactivation of  
7 ventral CA1 produced an avoidance of a conflict cue imbued with both learned positive and  
8 negative outcomes, whereas inactivation of the ventral CA3 resulted in the opposite pattern of  
9 behavior, with significant preference for the conflict cue. In contrast, dorsal CA1- and CA3-  
10 inactivated rats showed no change in conflict behavior. Our findings provide important insight  
11 into the functions and circuitry of the ventral hippocampus by demonstrating that the ventral CA1  
12 and CA3 subserve distinct and opposing roles in approach-avoidance conflict processing.

## 13 INTRODUCTION

14 The regulation and successful resolution of approach-avoidance conflict is a ubiquitous dilemma  
15 that organisms commonly face. Deciding to approach or avoid requires evaluating the incentive  
16 value of environmental stimuli that may be associated with both positive and negative valences.  
17 These ambivalent stimuli evoke a state of motivational conflict, which needs to be resolved in  
18 order that an effective response can be executed to maintain survival (Miller, 1944).

19 Despite the prevailing view that the predominant function of the hippocampus (HPC) is in  
20 mnemonic processing and/or spatial cognition (O'Keefe and Nadel, 1978; Eichenbaum, 2000), a  
21 significant body of rodent work has pointed towards a role for this structure in processing  
22 approach-avoidance conflict (for recent review see Ito and Lee, 2016). Animal models of  
23 approach-avoidance conflict have typically involved the initial establishment of an approach  
24 response, followed by the induction of conflict by later punishing the same learned response  
25 (Geller and Seifter, 1960; Vogel et al., 1971) or alternatively, taking advantage of conflicting  
26 innate behaviours (e.g. desire to explore vs. fear of being in an exposed environment) in  
27 ethological tests of anxiety such as the open field test and the elevated plus maze (e.g. Lister,  
28 1990; Rodgers et al., 1997; Belzung and Griebel, 2001). HPC lesions typically cause persistence  
29 of learned approach responses in the face of punishment (e.g. Kimura, 1958; Isaacson and  
30 Wickelgren, 1962; Kimble, 1963), and an increase in approach behaviour in ethological tests of  
31 anxiety (e.g. Bannerman et al., 1999; McHugh et al., 2004; Trivedi and Coover, 2004). This is  
32 also consistent with a substantial body of work showing potentiation of behavioural indices of  
33 appetitive motivation in HPC-lesioned animals, which include feeding, cued approach, intra-  
34 cranial self-stimulation and progressive schedules of food reinforcement (Davidson and Jarrard,  
35 1993; Tracy et al., 2001; Ito et al., 2005; Davidson et al., 2009; 2013). Together, these data speak

36 to the HPC, and particularly the ventral aspect of this structure having a critical role in the  
37 suppression of approach responses in situations of uncertainty (Gray and McNaughton, 2000;  
38 McHugh et al., 2008; Abela et al., 2013; Bannerman et al., 2014; Schumacher et al., 2016), and a  
39 threat to energy balance (Tracy et al., 2001). Convergent with this, a growing number of  
40 neuropsychological and functional neuroimaging studies in humans have demonstrated that the  
41 human analogue of the rodent ventral HPC, the anterior HPC, is significantly involved when  
42 participants are required to respond or make decisions under scenarios of high conflict (Bach et  
43 al., 2014; O'Neil et al., 2015; Oehrns et al., 2015; Loh et al., 2017).

44 Crucially, while much work on the role of the HPC in approach-avoidance conflict has  
45 focused on its differentiation along the dorsal-ventral axis of this structure, there has been  
46 comparatively little insight into potential functional differences along the transverse axis. The  
47 dentate gyrus (DG), CA3 and CA1 are three distinct subregions along this axis, and form  
48 predominantly unidirectional excitatory circuits, from DG to CA3, and then to CA1 (Amaral and  
49 Witter, 1989; Van Strien et al., 2009). While these subregions can be clearly demarcated on the  
50 basis of anatomical, physiological and computational evidence, separating them on the basis of  
51 functional evidence has been less straightforward. Existing research exploring the functional  
52 dissociations of HPC subfields have largely focused on their role in memory encoding and  
53 retrieval, novelty detection and spatiotemporal processes within the dorsal HPC, and attribute  
54 overlapping functions to the subregions. The DG has been implicated in novelty/mismatch  
55 detection, memory encoding and the ability to discriminate two similar memory representations  
56 (i.e. pattern separation). On the other hand, CA1 and CA3 have been implicated in varying  
57 degrees of memory encoding, pattern separation and completion (e.g. retrieval of a complete  
58 mnemonic representation based on a partial or degraded input) depending on the nature of

59 information and/or degree of dissimilarity between mnemonic representations and incoming  
60 sensory information (Lee et al., 2004; Leutgeb et al., 2004; e.g. Vazdarjanova and Guzowski,  
61 2004; Hoge and Kesner, 2007; Barbosa et al., 2012). Notably, substantially fewer studies have  
62 specifically explored the differential functions of these subregions within the ventral HPC. Those  
63 that have, have implicated ventral CA3 (vCA3) in spatial and non-spatial novelty detection, and  
64 retrieval of contextual fear memory, whereas ventral CA1 (vCA1) has been demonstrated to be  
65 crucial for the temporal ordering of olfactory information, non-spatial novelty detection and  
66 retrieval of contextual fear (Hunsaker et al., 2008; Beer et al., 2014). Moreover, of particular  
67 relevance to the present work, recent research has highlighted a critical role for ventral DG (vDG)  
68 in ethological tests of anxiety, with lesions to this region resulting in increased time spent in the  
69 open arms of the elevated plus maze and the central region of the open field maze in comparison  
70 to similar manipulations to dorsal DG (Weeden et al., 2015). To our knowledge, however, the  
71 involvement of vCA1 and vCA3 in approach-avoidance behaviour has yet to be explored  
72 systematically.

73         The current study sought, therefore, to reveal the differential contributions of rodent  
74 vCA1 and vCA3, and dorsal CA1 (dCA1) and CA3 (dCA3) to approach-avoidance conflict  
75 processing. To achieve this, we used a novel cue-based approach-avoidance paradigm (Figure 1)  
76 that has been recently shown to be sensitive to ventral HPC damage (Schumacher et al., 2016). In  
77 contrast to traditional rodent models of approach-avoidance conflict, a key strength of this task is  
78 that it is non-spatial in nature, an important characteristic given the role of the HPC in spatial  
79 cognition. Moreover, our paradigm is unique in that it uses learned, as opposed to innate,  
80 appetitive and aversive cues, and is able to disentangle the acquisition of incentive values from  
81 the expression of motivational conflict. Rats first learned to associate three distinct tactile cues

82 with a positive, negative or neutral outcome. Post-acquisition GABA<sub>A</sub> and GABA<sub>B</sub> agonist  
83 microinfusions using a muscimol/baclofen (M/B) cocktail were then conducted to selectively  
84 inactivate the CA1 or CA3 regions of the dorsal or ventral HPC, prior to an approach-avoidance  
85 conflict test in which the appetitive and aversive cues were presented in combination to create  
86 motivational conflict, alongside the neutral cue. We report that vCA1 inactivation induced a  
87 potentiation of avoidance tendency from the conflict cue, whereas vCA3 inactivation induced the  
88 opposite pattern, of increased approach tendency to the conflict cue. In contrast, dCA1 or dCA3  
89 inactivation had no impact on conflict behavior. Our results implicate ventral HPC subregions in  
90 having bidirectional control over approach-avoidance behaviour in the face of motivational  
91 conflict.

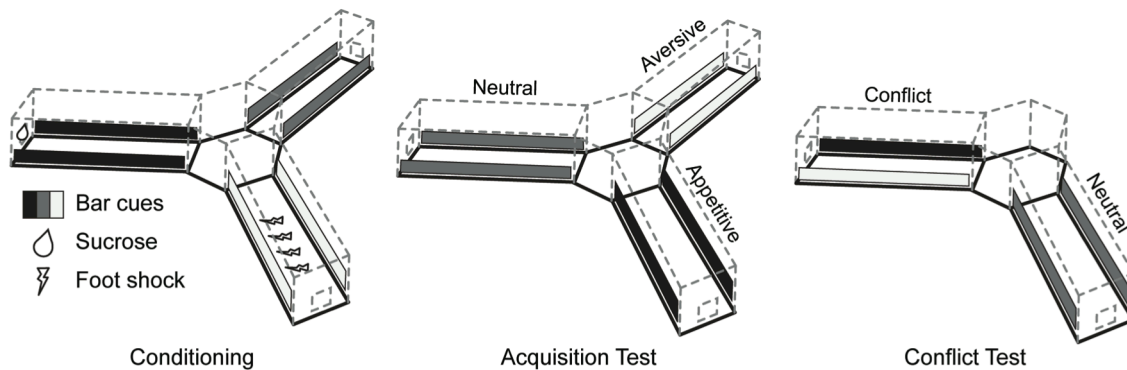

92 **Figure 1.** Schematic diagram of the non-spatial cue-based learned approach-avoidance paradigm.  
93 There were four different phases: **Habituation** (not shown), in which rodents were exposed to the  
94 radial arm apparatus and visuospatial cues. **Conditioning**, in which rodents learned the outcomes  
95 (appetitive, aversive, or neutral) associated with three visotactile cues. To minimise the use of  
96 spatial information, the positions of the cues were changed across conditioning sessions, with the  
97 maze rotated left or right by varying degrees (60°, 120°, or 180°) between each session, and the

98 entire maze was covered with red cellophane film to block the visibility of extra-maze cues.  
99 **Acquisition test**, in which rodents were assessed on their learning of the outcomes associated  
100 with each cue. **Conflict Test**, in which rodents were presented with a superimposition of positive  
101 and negative cues in one arm, and a neutral cue in another arm.

102

## 103 **RESULTS**

### 104 **Histological Verifications**

105 Inactivation sites of the dCA1 and dCA3 ranged from -3.3 to -3.8mm posterior to bregma  
106 (Paxinos and Watson, 1998), whereas rats with ventral HPC infusions showed inactivation sites  
107 ranging from -4.8 to -6.04mm posterior to bregma (Figure 2). Five rats in the dCA1 and dCA3  
108 groups and 8 rats in the vCA1 and vCA3 groups had infusion sites outside of the targeted regions  
109 and were, therefore, excluded from the study. Furthermore, a total of 6 rats did not acquire the  
110 mixed valence conditioning, and were subsequently removed from the study. Final group  
111 numbers were as follows: The ventral HPC group contained a total of 38 rats with 18 receiving  
112 M/B injections: 9 vCA1(M/B), 9 vCA3(M/B); and 20 receiving saline only injections as a control  
113 comparison: 10 vCA1(SAL) and 10 vCA3(SAL). The dorsal HPC group consisted of 23 rats with  
114 6 dCA1(M/B), 6 dCA3(M/B), 5 dCA1(SAL), and 6 dCA3(SAL). It is worth noting that there was  
115 neither extensive damage to the neuronal tissue nor extended gliosis around the injection site,  
116 indicating accurate surgical technique and infusion into the desired HPC subregion.

117

118

119

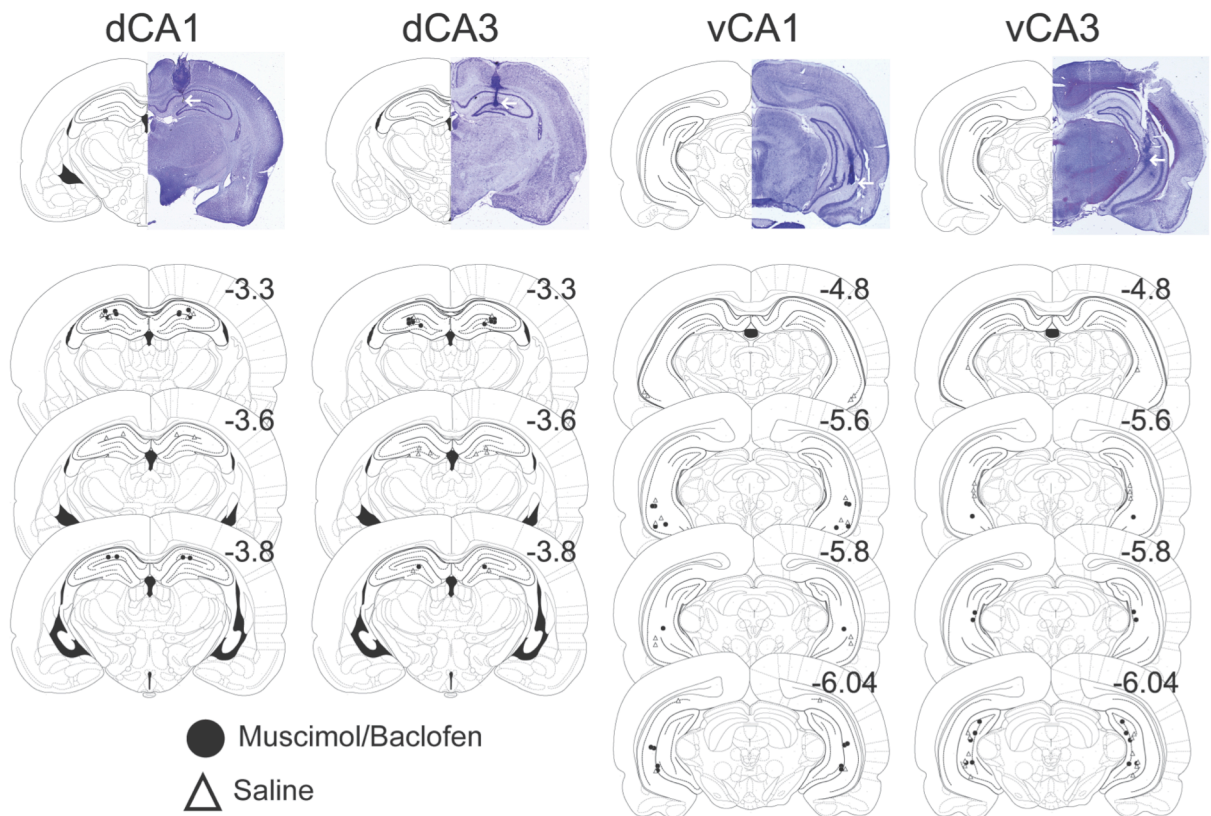

120 **Figure 2.** Representative photographic and schematic diagrams showing the location of the  
121 injector tips relative to bregma in the dorsal and ventral CA1 and CA3 of the hippocampus, for  
122 rats included in the data analysis. Black circles represent animals that received  
123 muscimol/baclofen at test and white triangles represent rats that received saline at test.

124

## 125 **Approach-Avoidance Conflict**

### 126 **Habituation**

127 Rats underwent three habituation sessions, one of which mimicked the conditions of the final  
128 approach-avoidance conflict test. More specifically, rats were exposed to two maze arms, one  
129 containing the neutral cue and another containing a superimposition of cues that were eventually  
130 assigned as appetitive and aversive cues. There were no differences in the time spent exploring  
131 the two arms (cues) during this habituation session in any of the dorsal HPC groups (Arm: F(1,



132 33) = 0.75,  $p = 0.40$ ) or ventral HPC groups (Arm:  $F(1,33) = 0.36$ ,  $p = 0.55$ ). Nor were there any  
133 significant differences in the exploratory performance of rats assigned to the dorsal HPC groups  
134 (Arm x Drug x Group:  $F(1,19) = 0.27$ ,  $p = 0.61$ ) or ventral HPC groups (Arm x Drug x Group,  
135  $F(1, 33) = 1.73$ ,  $p = 0.20$ ).

136

### 137 **Acquisition tests**

138 Rats performed a total of nine conditioning sessions to associate non-spatial cues with an  
139 appetitive, aversive or neutral outcome. Learning was assessed by performing a conditioned cue  
140 approach-avoidance test after 4 and 8 conditioning sessions, *without* any drug/saline infusions.  
141 ANOVA of the time spent in each of the three arms in the two cue acquisition tests revealed that  
142 all rats in the dorsal HPC group acquired the cue-outcome associations successfully by Test 2  
143 (Arm:  $F(2, 38) = 43.22$ ,  $p < 0.0001$ ; Test:  $F(1, 19) = 7.77$ ,  $p = 0.012$ ; Arm x Test interaction:  $F(2,$   
144  $38) = 11.31$ ,  $p < 0.0001$ ), with rats spending significantly more time in the appetitive arm  
145 (dCA1(M/B):  $p < 0.02$ ; dCA1(SAL):  $p < 0.04$ ; dCA3(M/B):  $p < 0.001$ ; dCA3(SAL):  $p < 0.05$ )  
146 and less time in the aversive arm (dCA1(M/B):  $p < 0.01$ ; dCA1(SAL):  $p < 0.01$ ; dCA3(M/B):  $p <$   
147  $0.01$ ; dCA3(SAL):  $p < 0.04$ ), relative to the neutral arm (Figure 3A). In addition, there were no  
148 pre-existing group differences in the acquisition of the three cue-outcome relationships (Drug:  
149  $F(1, 19) = 0.49$ ,  $p = 0.49$ ; Region:  $F(1, 19) = 0.015$ ,  $p = 0.90$ ; Test x Arm x Drug x Region:  $F(2,$   
150  $38) = 0.331$ ,  $p = 0.72$ ).

151 Similarly, ANOVA of the time spent in each of the three arms in the two acquisition tests  
152 in the four ventral HPC groups revealed that all rats acquired the cue-outcome associations  
153 successfully by Test 2 (Arm:  $F(2, 66) = 102.58$ ,  $p < 0.0001$ ; Arm x Test interaction:  $F(2, 66) =$   
154  $5.19$ ,  $p < 0.01$ ), as evidenced by their spending more time in the appetitive arm (vCA1(M/B):  $p <$

155 0.01; vCA1(SAL):  $p < 0.001$ ; vCA3(M/B):  $p < 0.03$ ; vCA3(SAL):  $p < 0.01$ ) and less time in the  
156 aversive arm (vCA1(M/B):  $p < 0.001$ ; vCA1(SAL):  $p < 0.02$ ; vCA3(M/B):  $p < 0.001$ ;  
157 vCA3(SAL):  $p < 0.001$ ), relative to the neutral arm (Figure 3B). In addition, there were no pre-  
158 existing group differences in the acquisition of the three cue-outcome associations (Region:  $F(1,$   
159  $33) = 1.19$ ,  $p = 0.28$ ; Drug:  $F(1,33) = 1.23$ ,  $p = 0.28$ ; Test x Arm x Drug x Region:  $F(2,66) =$   
160  $0.58$ ,  $p = 0.53$ ).

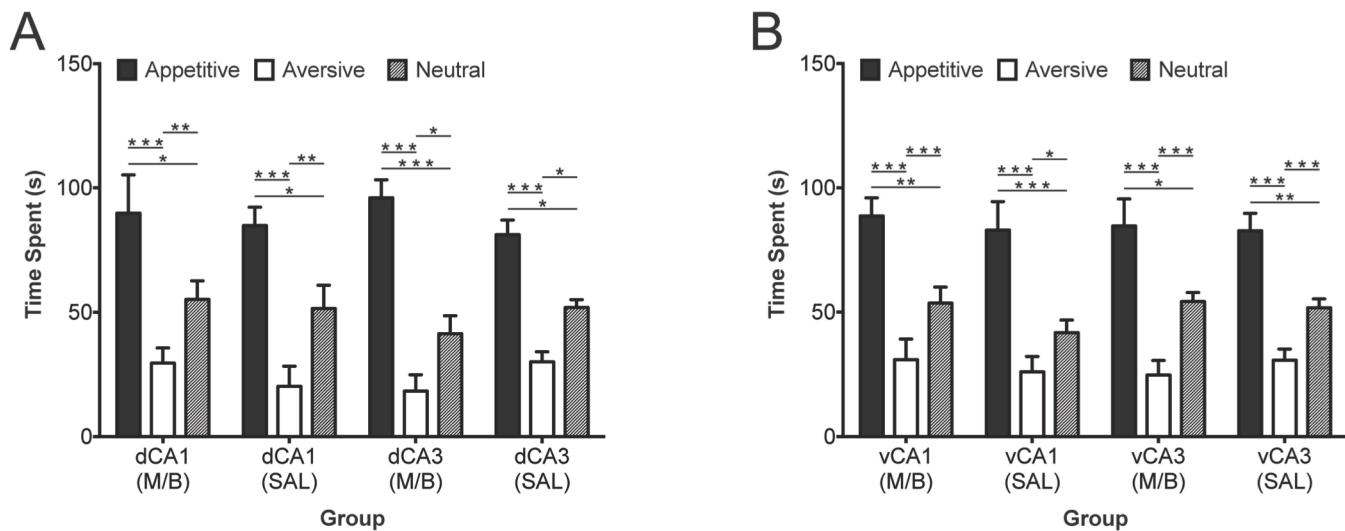

161 **Figure 3.** Mean ( $\pm$  SEM) time spent in arms with “appetitive,” “aversive,” and “neutral” cues  
162 during a test of concurrent conditioned cue preference and avoidance for rats that received either  
163 muscimol/baclofen (M/B) or saline (SAL) at test in the (A) dorsal CA1 and CA3 hippocampus,  
164 and the (B) ventral CA1 and CA3 hippocampus. \*  $p < 0.05$ , \*\*  $p < 0.01$ , \*\*\*  $p < 0.001$ . Mean and  
165 standard error values, as well as 95% confidence intervals are reported in Supplemental Table S1.

166

## 167 Conflict Test

### 168 Conflict cue approach-avoidance

169 The conflict test was administered following the successful acquisition of the three cue-outcome  
170 associations. The test session involved the rats being allowed to freely explore two arms:

171 combined appetitive and aversive cues in one arm (conflict arm), and neutral cues in another arm  
172 (neutral arm), following bilateral microinfusions of drug M/B or saline into target sites. ANOVA  
173 of the overall time spent in each of the two arms revealed that rats in all four dorsal HPC groups  
174 showed no difference in the time spent exploring the two arms during the conflict test (Arm:  
175  $F(1,19) = 0.01$ ,  $p = 0.94$ ,  $h_p^2 = 0.0001$ ), indicating that neither approach, nor avoidance of the  
176 conflict cue dominated their behaviour in the face of motivational conflict (Figure 4A).  
177 Furthermore, the performance of the dCA1- and dCA3-inactivated groups did not significantly  
178 differ from that of the saline controls (Arm x Drug x Region,  $F(1, 19) = 1.73$ ,  $p = 0.21$ ,  $h_p^2 =$   
179  $0.08$ ).

180 In contrast, ANOVA of the overall time spent in each of the two arms in the four ventral  
181 HPC groups revealed significantly altered performance in the conflict test between the vCA1 and  
182 vCA3-inactivated groups, and their control groups (Arm x Drug x Region interaction:  $F(1, 33) =$   
183  $15.30$ ,  $p < 0.0001$ ,  $h_p^2 = 0.32$ , Figure 4B). More specifically, simple main effects analyses  
184 revealed a significant main effect of Arm in the vCA1-inactivated ( $F(1, 33) = 12.71$ ,  $p < 0.001$ ,  
185  $h_p^2 = 0.28$ ) and vCA3-inactivated ( $F(1, 33) = 21.68$ ,  $p < 0.0001$ ,  $h_p^2 = 0.40$ ) groups, but not in  
186 either of the saline groups (vCA1:  $F(1,33) = 0.0001$ ,  $p = 1.0$ ,  $h_p^2 = 0.0001$ , vCA3:  $F(1, 33) = 0.64$ ,  
187  $p = 0.43$ ,  $h_p^2 = 0.019$ ), indicating that the vCA1-inactivated rats spent significantly less time in the  
188 conflict arm ( $p < 0.001$ ) while vCA3-inactivated rats spent more time in the conflict arm ( $p <$   
189  $0.001$ ), compared to that in the neutral arm. Furthermore, inactivated vCA1 rats spent  
190 significantly more time in the neutral arm compared to their saline control group ( $p < 0.001$ ),  
191 while vCA3-inactivated rats showed a decreased time spent in the neutral arm compared to their  
192 saline control group ( $p = 0.034$ ). Thus, vCA1 inactivation led to increased avoidance tendencies,  
193 while vCA3 inactivation led to increased approach tendencies in the face of motivational conflict.

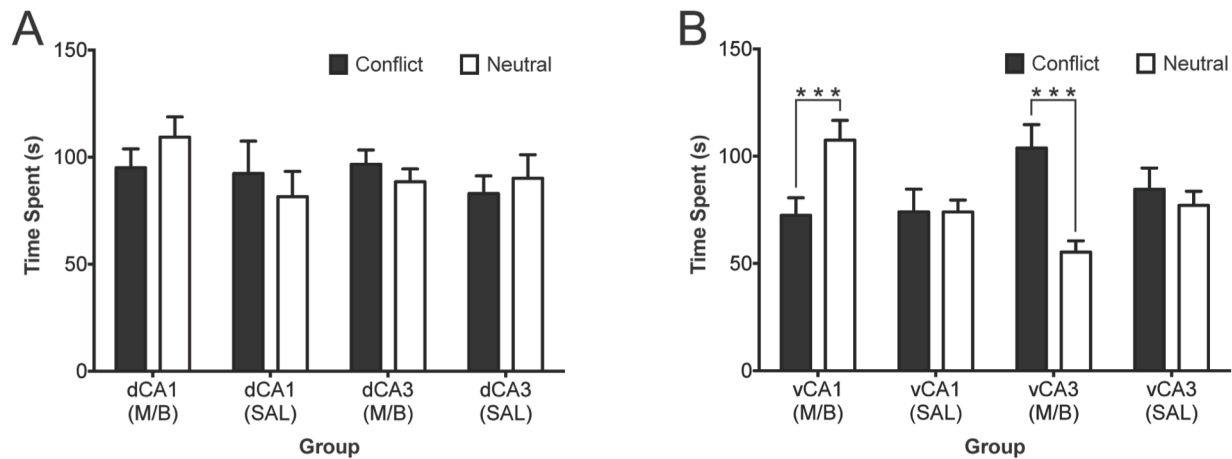

194

195 **Figure 4.** Mean ( $\pm$  SEM) time spent in arms containing cues of conflicting valence

196 (superimposed appetitive and aversive cues) or neutral cues during the conflict test following

197 administration of muscimol/baclofen (M/B) or saline (SAL) in the (A) dorsal CA1 and CA3

198 hippocampus, and in the (B) ventral CA1 and CA3 hippocampus. Ventral CA1 inactivation lead

199 to significantly more time spent in the neutral than the conflict arm, while ventral CA3

200 inactivation lead to significantly more time spent in the conflict arm than the neutral arm. \*\*\*  $p <$

201 0.001. Mean and standard error values, as well as 95% confidence intervals are reported in

202 Supplemental Table S2.

203

204 **Number of entries into conflict and neutral arms**

205 ANOVA of the total number of full body entries made into the conflict and neutral arms during

206 the conflict test in all dorsal HPC groups (Fig 5A) revealed no significant effects of any kind

207 (Arm ( $F(1, 19) = 1.86, p = 0.95$ ); Group:  $F(1, 19) = 1.54, p = 0.36$ ; Arm x Region x Drug  $F(1, 19)$

208  $= 0.016, p = 0.9$ ). In contrast, ANOVA of the total number of full body entries made into the

209 conflict and neutral arms during the conflict test in all ventral HPC groups (Fig 5B) revealed a

210 significant Arm x Region x Drug interaction ( $F(1, 33) = 5.05, p = 0.031$ ) as well as a significant  
211 Arm x Drug interaction ( $F(1,33) = 7.09, p = 0.012$ ). Subsequent simple effects analyses and  
212 pairwise comparison analyses attributed the significant three-way interaction to the number of  
213 entries between the conflict and neutral arms being significantly different in vCA1 ( $p = 0.03$ ) and  
214 vCA3 drug groups ( $p = 0.02$ ), with the vCA1-inactivated rats making fewer entries into the  
215 conflict arm, and the vCA3- inactivated rats making more entries into the conflict arm, compared  
216 to the neutral arm.

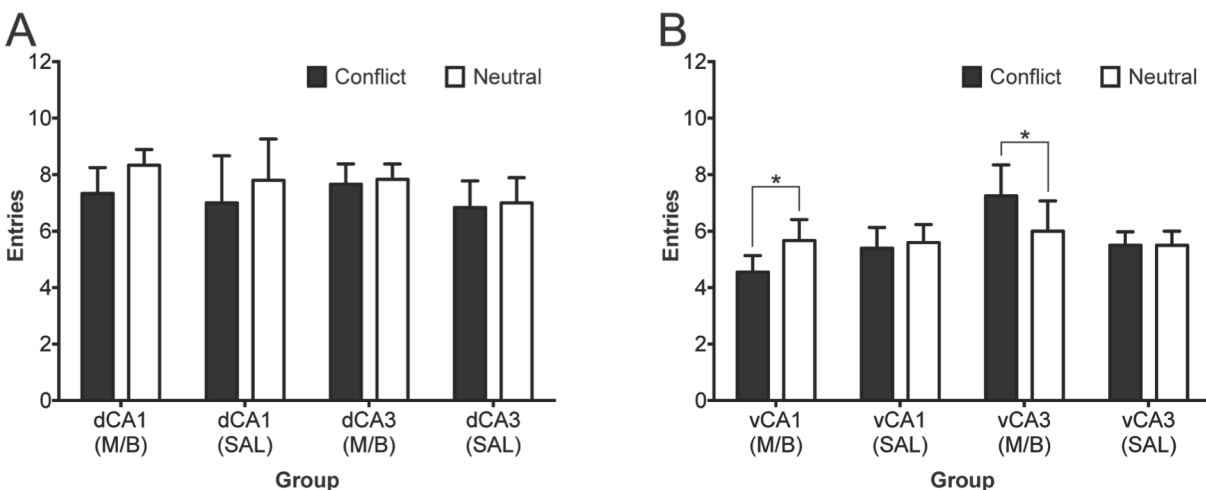

217 **Figure 5.** Mean ( $\pm$  SEM) number of entries in arms containing cues of conflicting valence  
218 (superimposed appetitive and aversive cues) or neutral cues during the conflict test following  
219 administration of muscimol/baclofen (M/B) or saline (SAL) in the (A) dorsal CA1 and CA3  
220 hippocampus, and in the (B) ventral CA1 and CA3 hippocampus. Mean and standard error  
221 values, as well as 95% confidence intervals are reported in Supplemental Table S2.

222

## 223 Light Dark Box

224 A standard ethological test of anxiety, the light dark box task, was used to assess potential  
225 differences in anxiety levels. ANOVA of the time spent exploring the light vs. dark

226 compartments of the box in the dorsal HPC group (Figure 6A) revealed that rats spent  
227 significantly more time in the dark, compared to the light compartment (Compartment:  $F(1(19) =$   
228  $34.32, p < 0.001)$ , and that there was no difference in performance between groups (Drug x  
229 Region:  $F(1, 19) = 2.26, p = 0.15$ ; Compartment x Drug x Region,  $F(1, 19) = 0.11, p = 0.75$ ).  
230 ANOVA of the time spent in the dark vs. light compartments in the ventral HPC groups (Figure  
231 6B) revealed a significant Drug x Compartment interaction ( $F(1, 33) = 9.69, p < 0.01$ ), but no  
232 other significant main effects, nor interactions (all  $p > 0.05$ ). Further simple effects analyses  
233 revealed the significant interaction effect to be attributable to the ventral HPC-inactivated groups  
234 (vCA1(M/B) and vCA3(M/B)) collectively spending significantly more time in the light  
235 compartment, and less time in the dark compartment than their saline counterparts ( $p < 0.01$ ).  
236 Thus, ventral HPC inactivation only, irrespective of the subfield targeted, induced a reduction in  
237 anxiety.

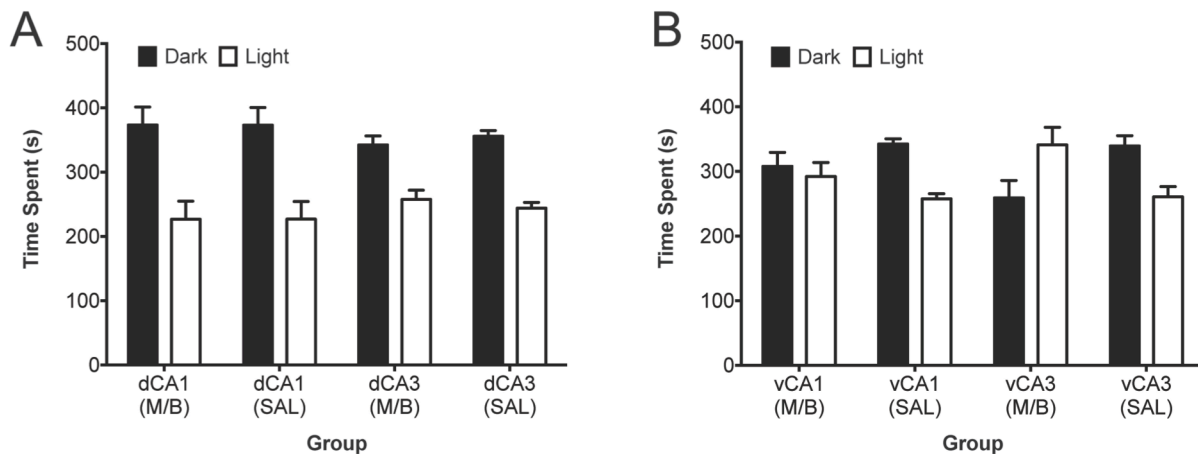

238 **Figure 6.** Mean ( $\pm$  SEM) time spent in the dark and light compartments during a light-dark box  
239 test of anxiety following administration of muscimol/baclofen (M/B) or saline (SAL) in the (A)  
240 dorsal CA1 and CA3 hippocampus, and in the (B) ventral CA1 and CA3 hippocampus. Mean and  
241 standard error values, as well as 95% confidence intervals are reported in Supplemental Table S3.  
242

## 243 **Novelty Detection Test**

244 To rule out alternative explanations of the conflict test data, rats were administered a novelty  
245 detection test in the same radial arm maze as that used for the approach-avoidance conflict  
246 paradigm, in which they were first allowed to explore two ‘familiar’ arms and were then exposed  
247 to a third ‘novel’ arm. ANOVA of the time spent exploring the novel vs. familiar arms in the  
248 dorsal HPC-manipulated groups (Figure 7A) revealed a significant Arm x Drug interaction ( $F(1,$   
249  $19) = 14.13, p < 0.0001$ ) and a main effect of Arm ( $F(1, 19) = 25.07, p < 0.0001$ ), but no three-  
250 way Region x Drug x Arm interaction ( $F(1,19) = 0.07, p = 0.80$ ). Simple effects analysis  
251 exploring the significant Arm x Drug interaction revealed that the saline-infused groups  
252 (dCA1(SAL) and dCA3 (SAL)) spent significantly more time in the novel arm, relative to the  
253 familiar arm ( $p < 0.0001$ ). In contrast, rats with inactivated dCA1 and dCA3 spent equal time  
254 exploring the familiar and novel arms ( $p = 0.38$ ). Furthermore, rats inactivated in the dCA1 and  
255 dCA3 spent more time in the familiar arm compared to their respective control groups ( $p <$   
256  $0.0001$ ). Similarly, ANOVA of the time spent exploring the novel vs. familiar arms in the ventral  
257 HPC-infused groups (Figure 7B) revealed a significant Arm x Drug interaction ( $F(1, 30) = 18.6, p$   
258  $< 0.0001$ ) and main effect of Arm ( $F(1,30) = 42.22, p < 0.0001$ ), but no three-way Region x Drug  
259 x Arm interaction ( $F(1, 30) = 0.21, p = 0.65$ ). Subsequent simple effects analysis revealed the  
260 significant Arm x Drug interaction to be due to the saline-infused groups (vCA1(SAL) and vCA3  
261 (SAL)) spending significantly more time in the novel arm, relative to the familiar arm ( $p <$   
262  $0.0001$ ), whereas there was no difference in time spent between the familiar and novel arms for  
263 both the vCA1(M/B) and vCA3(M/B) groups ( $p = 0.14$ ). Furthermore, inactivation of the vCA1  
264 and vCA3 led to less time spent in the novel arm, relative to their control groups ( $p < 0.0001$ ).  
265 Thus, inactivation of CA1 and CA3 regions in both the ventral HPC and dorsal HPC resulted in

266 impaired exploration of the novel arm.

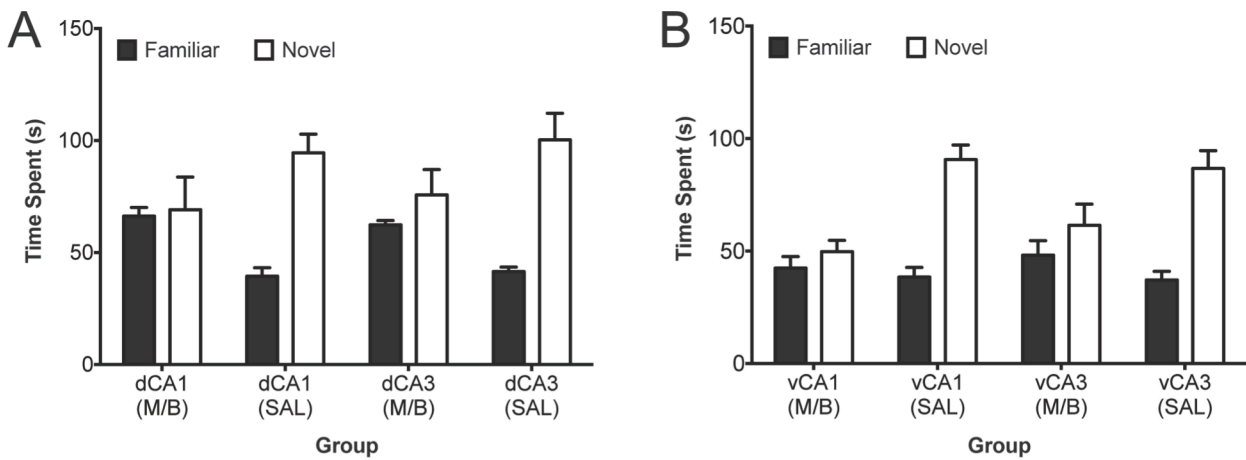

267

268 **Figure 7.** Mean ( $\pm$  SEM) time spent in a novel and familiar arm during a test of spatial novelty

269 following administration of muscimol/baclofen (M/B) or saline (SAL) in the (A) dorsal CA1 and

270 CA3 hippocampus, and the (B) ventral CA1 and CA3 hippocampus. Mean and standard error

271 values, as well as 95% confidence intervals are reported in Supplemental Table S4.

272

273 **Locomotor Activity**

274 Finally, baseline locomotor activity (Figure 8) was also measured to ensure that potential

275 differences in exploration times in the approach-avoidance conflict tests were not confounded by

276 changes in general activity. As expected, there was a significant within-subjects effect of Bin

277 ( $F(11,209) = 10.86, p < 0.0001$ ) reflecting the fact that there was a decrease of locomotor activity

278 across all groups. However, there was no significant difference in spontaneous locomotor activity

279 between the dorsal HPC groups (Region:  $F(1,19) = 1.71, p = 0.27$ , Region x Drug x Bin:

280  $F(11,209) = 0.60, p = 0.82$ ). The ventral HPC rats yielded similar results: there was no overall

281 Region effect ( $F(1,31) = 0.11, p = 0.75$ ) or any significant 3- or 2- way interactions between



282 Region, Bin and Drug (all  $F > 0.07$ ,  $p > 0.12$ ) but there was a significant within-subjects effect of  
283 Bin ( $F(11, 341) = 10.38$ ,  $p < 0.0001$ ) reflecting decreased locomotor activity over time. In  
284 summary, no differences in the baseline activity were found between animals of different  
285 subregions of the dorsal HPC and ventral HPC.

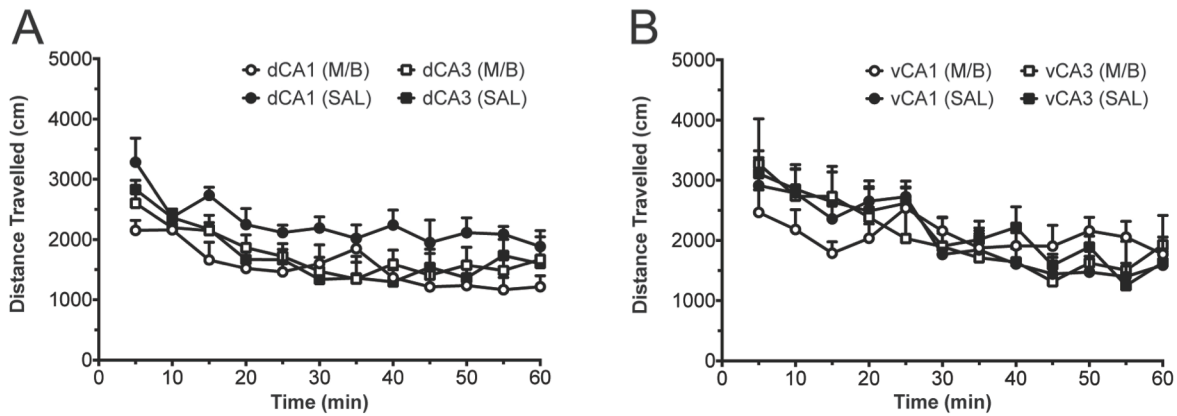

286 **Figure 8.** Mean ( $\pm$  SEM) distance travelled shown in 5 minute time bins during a test of general  
287 locomotor activity following administration of muscimol/baclofen (M/B) or saline (SAL) in the  
288 (A) dorsal CA1 and CA3 hippocampus, and in the (B) ventral CA1 and CA3 hippocampus. Mean  
289 and standard error values, as well as 95% confidence intervals are reported in Supplemental Table  
290 S5.

291

## 292 DISCUSSION

293 To our knowledge, we have demonstrated, for the first time, that the vCA1 and vCA3 subregions  
294 of the rodent HPC make differential contributions to approach-avoidance conflict processing.  
295 Using a non-spatial, learned approach-avoidance paradigm, post-training GABAR agonist-  
296 mediated inactivation of vCA1 was found to increase avoidance of a cue associated with  
297 conflicting valence information whereas inactivation of the vCA3 led to potentiated approach

298 behaviour in the face of motivational conflict. Notably, inactivation of dCA1 and dCA3 had no  
299 effect on conflict behaviour. Thus, in keeping with a large body of literature implicating a role for  
300 the ventral, but not dorsal, HPC in approach-avoidance conflict processing (Bannerman et al.,  
301 2004; 2012; Ito and Lee, 2016) our findings pertaining to the contrasting roles of CA1 and CA3  
302 appear to be specific to the ventral portion of the HPC.

303 Previous insight into the role of ventral HPC subregions in approach-avoidance conflict  
304 processing has been predominantly limited to studies that have focused on the role of DG in  
305 anxiety, and which have yielded somewhat inconsistent results. Weeden et al. (2015) observed  
306 increased amount of time spent in the open arms of the elevated-plus maze as well as the centre  
307 of the open field test following selective lesions of the ventral DG (vDG), but not dorsal DG. In  
308 contrast, Kheirbek et al. (2013) reported that light-induced *activation* of the ventral DG granule  
309 cells led to a reduction in anxiety-related behaviour, using the same two ethological tests of  
310 anxiety, which could not be accounted for by a change in locomotor exploratory behaviour.  
311 Although it is currently unclear how differential manipulations of vDG (i.e. optogenetic  
312 activation vs. lesion) can lead to similar anxiolytic effects, these data collectively implicate a role  
313 for the vDG in regulating approach-avoidance behaviour under circumstances of innate conflict  
314 (e.g. preference for enclosed spaces vs. desire to explore in the elevated plus maze).

315 Our current findings add significantly to this recent work by revealing how other regions  
316 within the ventral HPC trisynaptic circuit contribute to approach-avoidance conflict processing,  
317 with the vCA3 and vCA1 appearing to play opposing roles. Not dissimilar to the aforementioned  
318 findings pertaining to vDG, inactivation of vCA3 was observed to increase the amount of time  
319 that rodents spent exploring the maze arm containing the conflict cue, demonstrating potentiated  
320 approach tendency in the face of learned motivational conflict. In contrast, vCA1 activation led to

321 the opposite behavioral tendency (avoidance), with rodents spending significantly less time in the  
322 conflict cue arm and spending a higher proportion of time in the neutral cue arm. Given that  
323 previous findings from our laboratory have shown that ventral HPC lesions do not impair the  
324 acquisition of conditioned approach or avoidance behavior (Schumacher et al., 2016), the present  
325 results point to the vCA3 having a critical role in opposing/suppressing approach tendencies  
326 specifically in situations of learned approach-avoidance conflict, and the vCA1 in promoting  
327 approach behaviour under such conflict. This postulated role of the vCA3 is consistent with the  
328 findings of a recent optogenetic and chemogenetic study that observed suppression in feeding and  
329 anxiogenesis when the excitatory neurons in the vDG/vCA3 were chemogenetically activated,  
330 and conversely, facilitation of feeding when the vDG/vCA3 neurons were chemogenetically  
331 inactivated (Sweeney and Yang, 2015). Together with the plethora of evidence implicating the  
332 ventral HPC in suppressing approach responses in the face of a threat to energy homeostasis  
333 (Tracy et al., 2001; Davidson et al., 2009), the present findings help solidify the notion that the  
334 ventral HPC is fundamentally important in the regulation of innate and learned approach-  
335 avoidance decisions in states of environmental uncertainty and instability. Furthermore, the  
336 present study brings a novel extension of this view, in proposing that the ventral HPC has  
337 bidirectional control over approach-avoidance behaviours via region-specific, CA3- versus CA1-  
338 mediated mechanisms.

339 We speculate that such bidirectional control may be achieved through the vCA3 and  
340 vCA1 subfields operating as parts of independent circuits, as opposed to functioning in a serial  
341 fashion through a trisynaptic circuit (DG->CA3->CA1), in contrast to the traditional  
342 understanding of information flow through the HPC. In fact, the notion that each subregion does  
343 not necessarily depend on intrinsic circuitry for serial input is illustrated in studies in which

344 pharmacological disruptions to the DG or CA3 are shown not to have any debilitating effect on  
345 place field activity in the CA1 (Mizumori et al., 1989; Brun et al., 2002). Furthermore, the  
346 differential pattern of extrinsic CA3 and CA1 connectivity provides the means by which CA3 and  
347 CA1 subregions can function independently of one another. While the CA3 is most known for its  
348 intrinsic excitatory associational (CA3-to-CA3) and commissural (CA3 - contralateral CA3 and  
349 CA1) connections that constitute an ‘auto-associational’ network that enables the rapid and  
350 efficient encoding and recall of information (Nakazawa et al., 2002; Van Strien et al., 2009),  
351 there is compelling neuroanatomical evidence to suggest that it has a robust extrinsic connectivity  
352 with the lateral septum (LS). The projections from the CA3 to LS are thought to occur in a  
353 topographical manner, with the dCA3 projecting to the dorsal aspects of the lateral septum, and  
354 the vCA3 projecting to more ventral parts of the lateral septum (Witter, 2007). The LS itself has  
355 been widely implicated in the regulation of anxiety, albeit the exact nature of its role remains  
356 undetermined due to the varied direction of effects that LS manipulations have produced. For  
357 instance, selective pharmacological inactivation of the LS has been shown to reduce anxiety in  
358 ethological tests of anxiety such as the elevated plus maze (EPM), and shock-probe burying test  
359 (Menard and Treit, 1996; Degroot et al., 2001). However, these findings are hard to reconcile  
360 with lesion studies that have reported ‘septal or sham rage’ - increased display of defensive  
361 behaviors to otherwise innocuous stimuli following lateral (and medial) septum lesions (Albert  
362 and Brayley, 1979; Blanchard et al., 1979), or studies which report reduced anxiety-like behavior  
363 when the LS is electrically stimulated (Yadin et al., 1993). Recent studies employing circuit-  
364 specific approaches have sought to further elucidate the role of the ventral HPC-lateral septal  
365 pathway in anxiety and feeding regulation, but have yielded inconsistent results. For instance,  
366 Parfitt et al., (2017) found that a chemogenetic activation of the LS-projecting ventral HPC cells

367 led to reduction in anxiety, as tested in an array of ethological tests such as EPM and successive  
368 alley, while inactivation of the same neurons led to anxiogenic effects. In contrast, Sweeney and  
369 Yang (2015) found that optogenetic and chemogenetic activation of glutamatergic ventral HPC ->  
370 LS neurons suppressed food intake, while inactivation of lateral septal neurons blocked HPC-  
371 mediated suppression of feeding. Crucially, it should be noted that neither of these studies can  
372 confirm the exact locus of origin of the ventral HPC neurons projecting to the LS (e.g. CA3 vs.  
373 CA1), and the present findings highlight the importance of selectively targeting LS-projecting  
374 vCA1 and vCA3 neurons in future investigations.

375         In contrast to the CA3, the CA1 has a much wider extrinsic connectivity, projecting to a  
376 number of subcortical and cortical areas in addition to the LS (Van Groen and Wyss, 1990; Witter  
377 and Amaral, 2004). The LS-projecting CA1 neurons are also arranged topographically along the  
378 dorsal-ventral axis as with the projections originating in the CA3, although it is thought that the  
379 CA1 neurons terminate in more rostral areas of the LS compared to the CA3 neurons (Risold and  
380 Swanson, 1997; Naber and Witter, 1998). Thus, it is plausible that approach/avoidance behaviors  
381 are subserved by functionally separate, parallel ventral HPC-lateral septal loops. The CA1 also  
382 has extensive projections to the prelimbic/infralimbic cortex, amygdala and nucleus accumbens  
383 (NAc), and together with recent evidence from our laboratory demonstrating that transient  
384 GABAR<sub>A&B</sub> receptor-mediated inactivation of the caudal NAc core induces the same effect on  
385 learned approach-avoidance decision making as the present vCA1 inactivation effect (potentiated  
386 conditioned avoidance) (Hamel et al., 2017), the CA1 and NAc core may be candidates structures  
387 for forming a functional pathway that facilitates approach behaviour in the face of environmental  
388 uncertainty. This possibility warrants further investigation.

389         One further significant advance that the present study makes is in moving beyond the

390 domain of innate behaviour as assessed by ethological tests of anxiety, to examine HPC sub-  
391 region contributions to approach-avoidance conflict that arise as a result of learned cue-valence  
392 associations. This is an important step since a state of approach-avoidance conflict can often arise  
393 in response to stimuli that have no innate value, and for which the associated valences are  
394 acquired over time. Notably, we also administered a classic ethological anxiety test, the light-dark  
395 box in the current study and found that the pattern of results in the test did not recapitulate the  
396 results obtained with the learned approach-avoidance conflict test. Inactivation of both the vCA1  
397 and vCA3 regions reduced anxiety, with a visual inspection of the graph depicting the vCA3  
398 inactivation to have had a larger effect, with the rats spending more time in the more anxiogenic  
399 bright light box, as compared to the dark box. In contrast, the vCA1-inactivated rats appeared to  
400 spend equal time in the light and dark compartments. The inability to observe a direct  
401 correspondence in our vCA1 and vCA3 inactivation findings across the approach-avoidance  
402 conflict task and the dark-light box suggest that innate anxiety and learned approach-avoidance  
403 decision making are two dissociable psychological constructs that share some, and not all  
404 common neural substrates. In support of this, we have previously observed the manifestation of  
405 alterations in learned approach-avoidance conflict behaviour in the absence of concomitant  
406 changes in indices of innate anxiety following NAc core inactivation and repeated cocaine  
407 exposure (Nguyen et al., 2015; Hamel et al., 2017). We speculate that while approach-avoidance  
408 conflict processing may be a key component of anxiety, it is not the only contributing factor and  
409 that dysregulation of other decision-making and motivational processes are likely to contribute to  
410 the full spectrum of anxiety-related behaviour.

411         It is important to emphasize that the observed pattern of findings across HPC subregions  
412 and along the longitudinal axis cannot be accounted for by other factors including differences in

413 cue acquisition (as discussed earlier), novelty detection or changes to locomotor activity. Firstly,  
414 we did not observe any significant changes in spontaneous activity in any of the ventral or dorsal  
415 HPC inactivation groups. We also failed to see any differences in the total number of entries  
416 made into the conflict and neutral arms between any groups during the conflict test, a measure  
417 that is typically sensitive to changes in baseline locomotor activity. Secondly, the fact that  
418 inactivation of *all* dorsal and vCA1 and vCA3 subregions led to a marked impairment in novelty  
419 preference cannot fully explain the differential effect of manipulating the ventral and dorsal HPC  
420 CA3 and CA1 on learned approach-avoidance conflict behavior. Previous studies have implicated  
421 the dorsal HPC to be involved in spatial novelty processing (Lee et al., 2005; Wells et al., 2013),  
422 with one potential caveat that the successful novelty detection/preference requires the intact  
423 capacity to process spatial cues, which is also a function that the dorsal HPC is critical in (Moser  
424 et al., 1993; Bannerman et al., 1999; 2002). In the present task, we ensured that animals would be  
425 able to make use of both spatial (extra-maze) and non-spatial (intra-maze) cues to perform the  
426 novelty preference task, so we could assess the role of the dorsal and ventral HPC subregions in  
427 novelty processing *per se*, and to minimise the potential contribution of confounding factors  
428 (impaired spatial/cue processing). Very few studies have directly examined the role of the ventral  
429 HPC in novelty processing (Riaz et al., 2017), but the present findings suggest that the ventral  
430 HPC CA3 and CA1 subregions are as important as the dorsal HPC in mediating novelty  
431 processing.

432 In conclusion, we have provided novel insight into the differential contributions of ventral  
433 HPC regions to learned approach-avoidance conflict processing. Specifically, ventral, but not  
434 dorsal, CA1 and CA3 appear to play opposing roles in the regulation of with the former  
435 facilitating approach and the latter avoidance when an animal is confronted with circumstances of

436 high motivational conflict. Our findings have implications for our current understanding of the  
437 role of the HPC in motivational decision making and highlight the importance of considering  
438 differences not only along the longitudinal axis but also transverse axis of this structure.  
439 Furthermore, the observed contrasting effects of ventral CA1 and ventral CA3 inactivation upon  
440 approach-avoidance conflict behavior point to the existence of functionally distinct, extra-  
441 hippocampal neural circuits associated with individual HPC subfields, and thereby provide new  
442 insight into the functions and circuitry of the HPC beyond the much-studied unidirectional tri-  
443 synaptic hippocampal circuit.

444

## 445 **METHODS**

### 446 **Subjects**

447 Subjects were 80 male Long Evans rats (Charles Rivers Laboratories, QC, Canada) weighing  
448 between 350-400g prior to any procedures. Rats were housed in pairs with a constant room  
449 temperature of 21°C, under a 12 hour light/dark cycle. Water was provided *ad libitum* but food  
450 was restricted to maintain the rats at 85% of their free feeding body weight. All behavioral testing  
451 took place during the light cycle, in accordance with the ethical and legal requirements under  
452 Ontario's Animals for Research Act, the federal Canadian Council on Animal Care, and approval  
453 of the University of Toronto Scarborough Local Animal Care Committee.

454

### 455 **Surgery**

456 All rats were surgically implanted with bilateral guide cannulae overlying the dorsal or ventral  
457 HPC CA3 or CA1 regions, prior to the commencement of behavioral testing. Rats were assigned



458 into 2 (ventral or dorsal HPC) x 2 (CA3 or CA1) x 2 (Drug vs. Saline) experimental groups  
459 according to the anatomical location of their implanted cannulae as well as the drug with which  
460 they would be injected with, that is, a muscimol (GABA<sub>A</sub> receptor agonist) and baclofen  
461 (GABA<sub>B</sub> receptor agonist) cocktail (M/B) or saline (SAL): vCA1(M/B, n=12), vCA3(M/B,  
462 n=12), vCA1(SAL, n=12), vCA3(SAL, n=12), dCA1(M/B, n=8), dCA3(M/B, n=8), dCA1(SAL,  
463 n=8), and dCA3(SAL, n=8). All operated rats were anesthetized with isoflurane gas and placed in  
464 a stereotaxic frame (Stoelting, IL, USA). A midline incision along the skull was made, and the  
465 fascia retracted by small skin clips to reveal the cranial landmarks lambda and bregma. Guide  
466 cannulae (23 gauge; Coopers Needle Works, UK) were then implanted bilaterally relative to  
467 bregma, targeting the dCA1 (AP -3.6mm; ML ±2.5mm; DV -1.8mm), dCA3 (AP -3.6mm; ML  
468 ±2mm; DV -2.4mm), vCA1 (AP -5.8mm; ML ±5.4mm; DV -6.5mm) and the vCA3 (AP -5.8mm;  
469 ML ±4.6mm; DV -5mm) in accordance with Paxinos and Watson (1998). Cannulae were  
470 anchored to the skull using dental cement (Lang Dental, IL, USA) and miniature stainless steel  
471 screws. Solid stainless steel dummy cannulae (30 gauge; Coopers Needle Works, UK) were  
472 inserted into the guide cannulae to ensure patency for the duration of the experiment. Rats were  
473 given 7 days to recover before any behavioral testing with water and food available *ad libitum*.

474

## 475 **Microinfusion Procedure**

476 Muscimol and baclofen solutions were prepared separately at a concentration of 500ng/μl and  
477 combined in equal volumes to achieve a final concentration of 250ng/μl for each compound in  
478 accordance with previously reported dosages that induced behavioral alterations (Hamel et al.,  
479 2017; Riaz et al., 2017). The final infusion dose of the GABA<sub>A/B</sub> receptor agonist cocktail was  
480 75ng, delivered bilaterally at a volume of 0.3μl/side/minute, using an infusion pump (Harvard

481 Apparatus, Holliston, MA) mounted with a 5  $\mu$ l Hamilton syringe. A recent finding from our  
482 laboratory (Hamel et al., 2017) revealed that a 0.3 $\mu$ l (75ng) infusion of Muscimol/Baclofen  
483 induced a discrete 0.3mm radial drug spread/inhibition in the target brain area (nucleus  
484 accumbens), as evidenced by a significant reduction in C-Fos activation in the drug-infused, as  
485 compared to saline-infused brains. Given that we have used the same dose and volume of  
486 muscimol and baclofen in the present study, we have high confidence in the fact that the spread  
487 of drug/active radius of inactivation remained well within the confines of targeted subfields (CA3  
488 vs. CA1).

489         24 hours prior to the first drug infusion, all rats received a single infusion of 0.9% saline  
490 (SAL) bilaterally at 0.3 $\mu$ L/side to acclimatize rats to the infusion procedure, and to minimize the  
491 mechanical effects of subsequent drug infusions. During the infusion procedure, rats were lightly  
492 restrained, and the stainless-steel dummy cannulae were replaced with 30-gauge injectors  
493 (Plastics One, VA, USA) that extended 1mm beyond the guide cannulae. Injectors were  
494 connected to a syringe pump (WPI, FL, USA) that infused 0.3 $\mu$ L of the drug cocktail or 0.9%  
495 saline, over 1 minute. Injectors were left in place for an additional minute to allow for diffusion  
496 of the drug/saline away from the injection site. Rats were returned to their home cage for 10-15  
497 minutes before behavioral testing commenced.

498

## 499 **Behavioral Procedures**

### 500 **Approach-Avoidance Conflict Task**

#### 501 **Radial Arm Maze Apparatus**

502 Behavioral testing for the approach-avoidance conflict task was performed in an automated six-  
503 arm radial maze as previously described (Med Associates, VT, USA) (Nguyen et al., 2015;

504 Schumacher et al., 2016). Six identical enclosed arms (45.7 cm length X 16.5 cm height X 9.0 cm  
505 width) emanated from a hexagonal central hub, but only three out of the six arms were used  
506 throughout testing. Arms contained stainless steel grid floors connected to a foot shock generator  
507 and were enclosed by Plexiglas walls and removable lids covered in their entirety with red  
508 cellophane to limit the visibility and use of extra-maze cues. Automated stainless steel guillotine  
509 doors permitted access to the arms from the hub and vice-versa. The ends of each arm contained a  
510 port with a fluid receptacle connected to a syringe that allowed for the delivery of a 20% sucrose  
511 solution. A camera mounted above the apparatus was used to record behavioral testing. At the  
512 end of each session, the maze was cleaned with ethanol solution to eliminate odor traces and was  
513 rotated 60° clockwise to minimize conditioning to extraneous intra-maze cues.

514

### 515 **Preconditioning Habituation**

516 Rats were given three habituation sessions, as previously described (Schumacher et al., 2016). In  
517 each session, animals were placed in the central hub for one minute, followed by the opening of  
518 all two or three guillotine doors to allow the rats to freely explore the arms for a further five  
519 minutes. In the first habituation session, the rats were exposed to all three arms without any cue  
520 inserts. In the second habituation session, rats were exposed to three pairs of bar cues (45cm  
521 length x 4cm width x 0.5cm height, wood panels varying in color and texture) lining the full  
522 length of the sidewall of each of the arms. In this session, the exploration time of each cued arm  
523 was recorded to help determine the assignment of valence (appetitive, aversive, neutral) to each  
524 cue. Where there were innate preferences for one cue over the others, the most preferred cue was  
525 assigned the aversive valence, and the least preferred cue assigned the appetitive valence. During  
526 the third habituation session, rats were presented with two sets of cues in two arms, with one of

527 the arms containing a pair of ‘to be assigned’ neutral cues, as determined from the second  
528 habituation session. The other arm contained a combinatorial cue comprised of one bar cue to be  
529 associated with appetitive valence and another bar cue to be assigned aversive valence. This  
530 session mimicked the conditions of the approach-avoidance conflict test (see section ‘Approach-  
531 Avoidance Conflict Test’) in order to eliminate the novelty of experiencing a combinatorial cue.  
532 Time spent exploring each cued arm was measured.

### 533 **Non-spatial Mixed Valence Cue Conditioning**

534 Cue conditioning sessions were conducted once per day over the course of nine consecutive days.  
535 In each conditioning session, rats were first placed in the central hub for 30 seconds followed by  
536 two minutes of confinement in each of the three cued arms, with the order of arm presentation  
537 counterbalanced across animals, and across sessions. In the arm containing the appetitive cue, rats  
538 received four randomly administered aliquots of 0.4ml of 20% sucrose solution, while in the arm  
539 with the aversive cue, rats were administered four mild foot shocks (0.5s, 0.25mA - 0.30mA)  
540 administered at a random inter-shock interval ranging from 15 - 25s. In the arm that contained the  
541 neutral cue, rats did not experience any reward or shock. Notably, previous work in our lab  
542 (Nguyen et al., 2015; Ito and Lee, 2016; Schumacher et al., 2016; Hamel et al., 2017) had  
543 established that these specific magnitudes of unconditioned stimuli (sucrose and foot shock) were  
544 required for the uniform, and balanced development of conditioned approach and avoidance  
545 behaviour. To ensure that outcomes were conditioned specifically to the bar cues (and not to any  
546 other available intra-maze or extra-maze cues), the placement of the bar cues was  
547 counterbalanced across rats, and changed across sessions, and the maze was rotated left or right  
548 by varying degrees (60°, 120°, or 180°) between each conditioning session. The entire maze was  
549 also covered with red cellophane film to block the visibility of extra-maze cues, while allowing

550 video recording to take place via an infrared camera mounted on the ceiling.

551

### 552 **Conditioned Cue Approach/Avoidance Test**

553 Two conditioned cue approach/avoidance tests were conducted, one prior to conditioning session  
554 five and another prior to session nine, to demonstrate that the rats had learned the association  
555 between cues and their respective outcomes. The testing was identical to habituation session two,  
556 with the rats allowed to explore the appetitive, aversive, and neutral cued arms in extinction  
557 (without any outcomes) for 5 minutes. The time spent exploring each arm was recorded for each  
558 test. Successful acquisition of the cue contingencies was determined as rats spending more time  
559 exploring the appetitive cue (conditioned approach) and less time exploring the aversive cue  
560 (conditioned avoidance), relative to the neutral cue.

561

### 562 **Approach-Avoidance Conflict Test**

563 Prior to the approach-avoidance conflict test, rats that demonstrated successful cue acquisition  
564 underwent drug or saline infusion into the target hippocampal area (see section ‘Microinfusion  
565 Procedure’). During the conflict test (in which 2 maze arms were used), rats were first placed in  
566 the central hub for one minute, after which a state of approach-avoidance conflict was induced by  
567 presenting the appetitive and aversive cue concurrently in one arm, and presenting the neutral cue  
568 in another arm. During this test, two measures were recorded: 1) the total time spent in the  
569 conflict arm and neutral arm; and 2) the number of full bodies entries made into each of the two  
570 arms.

571

572

## 573 **Light Dark Box**

574 The light dark box test, used as a measure for innate anxiety, was conducted immediately after  
575 the rat finished the approach-avoidance conflict test while the drug effect was still likely to be  
576 present. The apparatus consisted of two conjoined compartments (Plexiglas; 60cm length x 30cm  
577 width x 25cm height), one with transparent walls (light box), and another with opaque black walls  
578 (dark box). An opaque black divider separated the compartments with an opening (12cm width x  
579 12cm height) at the center of its base that allowed access between the compartments. The light  
580 box was illuminated by a lamp (11 watts) hanging 15cm above the ceiling of the light  
581 compartment. Both compartments were sealed using a wire mesh, and the dark box was covered  
582 by an opaque black Plexiglas sheet to prevent light entry. During the test, rats were placed in the  
583 middle of the light box and given 10 minutes to freely explore the apparatus. Time spent in each  
584 box was recorded. Furthermore, the light-dark ratio, calculated by the time spent in the light box  
585 relative to the total time in both boxes, was used to show differences between the inactivated CA1  
586 and CA3 groups compared to their control groups.

587

## 588 **Novelty Detection**

589 The same 6-arm radial maze from the approach-avoidance conflict task was used to test novelty  
590 detection in rats. Three of the six arms that were not used in the approach-avoidance conflict test  
591 were used and decorated with distinct visual cues lining outside the arm walls, and the lids were  
592 left open for visual access to extra-maze cues. Rats were therefore able to use both intra- and  
593 extra-maze cues to detect novelty. Prior to the novelty detection test, rats underwent the  
594 drug/saline microinfusion procedure (see section ‘Microinfusion Procedure’). The test consisted  
595 of two phases: a habituation and a test phase. During habituation, rats were placed at the end of

596 one arm and presented with an additional arm. Rats were permitted to explore both (familiar)  
597 arms for 10 minutes, and the time spent exploring each arm was recorded. If the rats showed  
598 similar exploration pattern for both arms, they were tested in the second and final phase. During  
599 the test phase, rats were given access to a third “novel” arm and to the two familiar arms for 5  
600 minutes. Time spent exploring each arm was recorded, and an average for the time spent  
601 exploring the two familiar arms was calculated for comparison with the novel arm.

602

### 603 **Locomotor Activity**

604 The locomotor activity test was conducted following completion of the novelty detection test  
605 while rats were still under the influence of the drug. Rats were placed individually in activity  
606 chambers (44cm length x 24cm width x 20cm height) lined with standard bedding and sealed  
607 with stainless steel chamber lids. Total distance travelled (in cm) for one hour, divided in 12 five-  
608 minute bins, was measured using an overhead camera and EthoVision tracking software (Noldus  
609 Information Technology, ON, Canada).

610

### 611 **Histology**

612 All rats were deeply anaesthetized with an overdose of pentobarbital (200 mg/kg intraperitoneal;  
613 Bimeda-MTC, ON, Canada) and transcardially perfused with 0.9% saline and 4%  
614 paraformaldehyde. Brains were removed and stored overnight in 4% paraformaldehyde, followed  
615 by 30% sucrose for an additional 48 hours. Brain tissue was then frozen and sliced (50 $\mu$ m) using  
616 a freezing microtome, mounted onto slides and stained with cresyl violet, to be viewed under the  
617 microscope for verification of correct cannula and injector tip placement. Based on the Paxinos  
618 and Watson brain atlas (1998), rats with misplaced cannulae and injector tips that extended

619 beyond the boundaries of each hippocampal subfield were excluded from the study (see section  
620 ‘Histological Verifications’ for details).

621

## 622 **Statistical Analysis**

623 Data were analyzed using the SPSS statistical package version 21.0 (IBM, ON, Canada).  
624 Analysis of variance (ANOVA) was applied to all experimental data. The factors “region” and  
625 “drug” were set as the between-subjects factors for all behavioral tasks, while the factor “arm”  
626 served as the within-subjects factor for the habituation and conflict tests of the approach-  
627 avoidance conflict task, as well as the light dark box (referred to as ‘compartment’), and novelty  
628 detection. The locomotor activity task was analyzed with the factor “bin” as the within-subjects  
629 factor, while both acquisition tests of the approach-avoidance conflict task were analyzed with  
630 the factors “arm” and test” as within-subjects factors. Furthermore, all significant main within-  
631 subjects effects, three- or four-way interactions were explored further using paired samples t-  
632 tests, simple effect analyses, and/or post-hoc comparisons with a Bonferroni correction.

633

## 634 **COMPETING INTERESTS**

635 The authors have no competing interests to declare.

636

## 637 **REFERENCES**

- 638 Abela AR, Dougherty SD, Fagen ED, Hill CJR, Chudasama Y (2013) Inhibitory Control Deficits  
639 in Rats with Ventral Hippocampal Lesions. *Cereb Cortex* 23:1396–1409.
- 640 Albert DJ, Brayley KN (1979) Mouse killing and hyperreactivity following lesions of the medial  
641 hypothalamus, the lateral septum, the bed nucleus of the stria terminalis, or the region ventral  
642 to the anterior septum. *Physiol Behav* 23:439–443.



- 643 Amaral DG, Witter MP (1989) The three-dimensional organization of the hippocampal  
644 formation: a review of anatomical data. *Neuroscience* 31:571–591.
- 645 Bach DR, Guitart-Masip M, Packard PA, Miró J, Falip M, Fuentemilla L, Dolan RJ (2014)  
646 Human Hippocampus Arbitrates Approach-Avoidance Conflict. *Curr Biol* 24:541–547.
- 647 Bannerman DM, Bus T, Taylor A, Sanderson DJ, Schwarz I, Jensen V, Hvalby Ø, Rawlins JNP,  
648 Seeburg PH, Sprengel R (2012) Dissecting spatial knowledge from spatial choice by  
649 hippocampal NMDA receptor deletion. *Nat Neurosci* 15:1153–1159.
- 650 Bannerman DM, Deacon RMJ, Offen S, Friswell J, Grubb M, Rawlins JNP (2002) Double  
651 dissociation of function within the hippocampus: Spatial memory and hyponeophagia. *Behav*  
652 *Neurosci* 116:884–901.
- 653 Bannerman DM, Rawlins JNP, McHugh SB, Deacon RMJ, Yee BK, Bast T, Zhang WN,  
654 Pothuizen HHJ, Feldon J (2004) Regional dissociations within the hippocampus—memory  
655 and anxiety. *Neurosci Biobehav Rev* 28:273–283.
- 656 Bannerman DM, Sprengel R, Sanderson DJ, Mchugh SB, Rawlins JNP, Monyer H, Seeburg PH  
657 (2014) nrm3677-1. *Nat Rev Neurosci* 15:181–192.
- 658 Bannerman DM, Yee BK, Good MA, Heupel MJ, Iversen SD, Rawlins JN (1999) Double  
659 dissociation of function within the hippocampus: a comparison of dorsal, ventral, and  
660 complete hippocampal cytotoxic lesions. *Behav Neurosci* 113:1170–1188.
- 661 Barbosa FF, de Oliveira Pontes IM, Ribeiro S, Ribeiro AM, Silva RH (2012) Differential roles of  
662 the dorsal hippocampal regions in the acquisition of spatial and temporal aspects of episodic-  
663 like memory. *Behav Brain Res* 232:269–277.
- 664 Beer Z, Chwiesko C, Sauvage MM (2014) Processing of spatial and non-spatial information  
665 reveals functional homogeneity along the dorso-ventral axis of CA3, but not CA1. *Neurobiol*  
666 *Learn Mem* 111:56–64.
- 667 Belzung C, Griebel G (2001) Measuring normal and pathological anxiety-like behaviour in mice:  
668 a review. *Behav Brain Res* 125:141–149.
- 669 Blanchard DC, Blanchard RJ, Lee EM, Nakamura S (1979) Defensive behaviors in rats following  
670 septal and septal-amygdala lesions. *J Comp Physiol Psychol* 93:378–390.
- 671 Brun VH, Otnass MK, Molden S, Steffenach H-A, Witter MP, Moser M-B, Moser EI (2002)  
672 Place cells and place recognition maintained by direct entorhinal-hippocampal circuitry.  
673 *Science* 296:2243–2246.
- 674 Davidson TL, Chan K, Jarrard LE, Kanoski SE, Clegg DJ, Benoit SC (2009) Contributions of the  
675 hippocampus and medial prefrontal cortex to energy and body weight regulation.  
676 *Hippocampus* 19:235–252.
- 677 Davidson TL, Hargrave SL, Swithers SE, Sample CH, Fu X, Kinzig KP, Zheng W (2013) Inter-

- 678 relationships among diet, obesity and hippocampal-dependent cognitive function.  
679 Neuroscience 253:110–122.
- 680 Davidson TL, Jarrard LE (1993) A role for hippocampus in the utilization of hunger signals.  
681 Behav Neural Biol 59:167–171.
- 682 Degroot A, Kashluba S, Treit D (2001) Septal GABAergic and hippocampal cholinergic systems  
683 modulate anxiety in the plus-maze and shock-probe tests. Pharm Biochem Behav 69:391–  
684 399.
- 685 Eichenbaum HB (2000) A cortical-hippocampal system for declarative memory. Nat Rev  
686 Neurosci 1:41–50.
- 687 Geller I, Seifter J (1960) The effects of meprobamate, barbiturates, d-amphetamine and  
688 promazine on experimentally induced conflict in the rat. Psychopharm 1:482–492.
- 689 Gray JA, McNaughton N (2000) The Neuropsychology of Anxiety: An enquiry into the functions  
690 of the septo-hippocampal System. New York: Oxford University Press.
- 691 Hamel L, Thangarasa T, Samadi O, Ito R (2017) Caudal Nucleus Accumbens Core Is Critical in  
692 the Regulation of Cue-Elicited Approach-Avoidance Decisions. eNeuro 4:ENEURO.0330–  
693 16.2017–14.
- 694 Hoge J, Kesner RP (2007) Role of CA3 and CA1 subregions of the dorsal hippocampus on  
695 temporal processing of objects. Neurobiol Learn Mem 88:225–231.
- 696 Hunsaker MR, Fieldsted PM, Rosenberg JS, Kesner RP (2008) Dissociating the roles of dorsal  
697 and ventral CA1 for the temporal processing of spatial locations, visual objects, and odors.  
698 Behav Neurosci 122:643–650.
- 699 Isaacson RL, Wickelgren WO (1962) Hippocampal Ablation and Passive Avoidance. Science  
700 138:1104–1106.
- 701 Ito R, Everitt BJ, Robbins TW (2005) The hippocampus and appetitive Pavlovian conditioning:  
702 effects of excitotoxic hippocampal lesions on conditioned locomotor activity and  
703 autoshaping. Hippocampus 15:713–721.  
704
- 705 Ito R, Lee ACH (2016) The role of the hippocampus in approach-avoidance conflict decision-  
706 making: Evidence from rodent and human studies. Behav Brain Res 313:345–357.
- 707 Kheirbek MA, Drew LJ, Burghardt NS, Costantini DO, Tannenholz L, Ahmari SE, Zeng H,  
708 Fenton AA, Hen R (2013) Differential Control of Learning and Anxiety along the  
709 Dorsoventral Axis of the Dentate Gyrus. Neuron 77:955–968.
- 710 Kimble DP (1963) The effects of bilateral hippocampal lesions in rats. J Comp Physiol Psychol.
- 711 Kimura D (1958) Effects of selective hippocampal damage on avoidance behaviour in the rat.  
712 Can J Psychol 12:213–218.

- 713 Lee I, Hunsaker MR, Kesner RP (2005) The Role of Hippocampal Subregions in Detecting  
714 Spatial Novelty. *Behav Neurosci* 119:145–153.
- 715 Lee I, Yoganarasimha D, Rao G, Knierim JJ (2004) Comparison of population coherence of place  
716 cells in hippocampal subfields CA1 and CA3. *Nature* 430:456–459.
- 717 Leutgeb S, Leutgeb JK, Treves A, Moser M-B, Moser EI (2004) Distinct ensemble codes in  
718 hippocampal areas CA3 and CA1. *Science* 305:1295–1298.
- 719 Lister RG (1990) Ethologically-based animal models of anxiety disorders. *Pharmacol Ther*  
720 46:321–340.
- 721 Loh E, Kurth-Nelson Z, Berron D, Dayan P, Duzel E, Dolan R, Guitart-Masip M (2017) Parsing  
722 the Role of the Hippocampus in Approach-Avoidance Conflict. *Cereb Cortex* 27:201–215.
- 723 McHugh SB, Campbell TG, Taylor AM, Rawlins JNP, Bannerman DM (2008) A role for dorsal  
724 and ventral hippocampus in inter-temporal choice cost-benefit decision making. *Behav*  
725 *Neurosci* 122:1–8.
- 726 McHugh SB, Deacon RMJ, Rawlins JNP, Bannerman DM (2004) Amygdala and Ventral  
727 Hippocampus Contribute Differentially to Mechanisms of Fear and Anxiety. *Behav Neurosci*  
728 118:63–78.
- 729 Menard J, Treit D (1996) Lateral and medial septal lesions reduce anxiety in the plus-maze and  
730 probe-burying tests. *Physiol Behav* 60:845–853.
- 731 Miller NE (1944) Experimental studies of conflict. In: *Personality and the behaviour disorders* (M  
732 HJ, ed), pp 431–465. Oxford.
- 733 Mizumori SJ, McNaughton BL, Barnes CA, Fox KB (1989) Preserved spatial coding in  
734 hippocampal CA1 pyramidal cells during reversible suppression of CA3c output: evidence  
735 for pattern completion in hippocampus. *J Neurosci* 9:3915–3928.
- 736 Moser EI, Moser M-B, Andersen P (1993) Spatial learning impairment parallels the magnitude of  
737 dorsal hippocampal lesions, but is hardly present following ventral lesions. *J Neurosci*  
738 13:3916–3925.
- 739 Naber PA, Witter MP (1998) Subicular efferents are organized mostly as parallel projections: a  
740 double-labeling, retrograde-tracing study in the rat. *J Comp Neurol* 393:284–297.
- 741 Nakazawa K, Quirk MC, Chitwood RA, Watanabe M, Yeckel MF, Sun LD, Kato A, Carr CA,  
742 Johnston D, Wilson MA, Tonegawa S (2002) Requirement for hippocampal CA3 NMDA  
743 receptors in associative memory recall. *Science* 297:211–218.
- 744 Nguyen D, Schumacher A, Erb S, Ito R (2015) Aberrant approach-avoidance conflict resolution  
745 following repeated cocaine pre-exposure. *Psychopharm* 232:3573–3583.
- 746 O'Keefe J, Nadel L (1978) *The hippocampus as a cognitive map*. Oxford University Press.

- 747 Available at: <http://www.cognitivemap.net/index.html>.
- 748 O'Neil EB, Newsome RN, Li IHN, Thavabalasingam S, Ito R, Lee ACH (2015) Examining the  
749 role of the human hippocampus in approach-avoidance decision making using a novel  
750 conflict paradigm and multivariate functional magnetic resonance imaging. *J Neurosci*  
751 35:15039–15049.
- 752 Oehrns CR, Baumann C, Fell J, Lee H, Kessler H, Habel U, Hanslmayr S, Axmacher N (2015)  
753 Human Hippocampal Dynamics during Response Conflict. *Curr Biol* 25:2307–2313.
- 754 Parfitt GM, Nguyen R, Bang JY, Aqrabawi AJ, Tran MM, Seo DK, Richards BA, Kim JC (2017)  
755 Bidirectional Control of Anxiety-Related Behaviors in Mice: Role of Inputs Arising from the  
756 Ventral Hippocampus to the Lateral Septum and Medial Prefrontal Cortex.  
757 *Neuropsychopharmacology* 42:1715–1728.
- 758 Paxinos G, Watson C (1998) *The rat brain in stereotaxic coordinates*, 4 ed. London: Academic  
759 Press.
- 760 Riaz S, Schumacher A, Sivagurunathan S, van der Meer M, Ito R (2017) Ventral, but not dorsal,  
761 hippocampus inactivation impairs reward memory expression and retrieval in contexts  
762 defined by proximal cues. *Hippocampus* 27:822–836.
- 763 Risold PY, Swanson LW (1997) Connections of the rat lateral septal complex. *Brain Res Brain*  
764 *Res Rev* 24:115–195.
- 765 Rodgers RJ, Cao BJ, Dalvi A, Holmes A (1997) Animal models of anxiety: an ethological  
766 perspective. *Braz J Med Biol Res* 30:289–304.
- 767 Schumacher A, Vlassov E, Ito R (2016) The ventral hippocampus, but not the dorsal  
768 hippocampus is critical for learned approach-avoidance decision making. *Hippocampus*  
769 26:530–542.
- 770 Sweeney P, Yang Y (2015) An excitatory ventral hippocampus to lateral septum circuit that  
771 suppresses feeding. *Nature Communications* 6:1–11.
- 772 Tracy AL, Jarrard LE, Davidson TL (2001) The hippocampus and motivation revisited: appetite  
773 and activity. *Behav Brain Res* 127:13–23.
- 774 Trivedi MA, Coover GD (2004) Lesions of the ventral hippocampus, but not the dorsal  
775 hippocampus, impair conditioned fear expression and inhibitory avoidance on the elevated T-  
776 maze. *Neurobiol Learn Mem* 81:172–184.
- 777 Van Groen T, Wyss JM (1990) Extrinsic projections from area CA1 of the rat hippocampus:  
778 Olfactory, cortical, subcortical, and bilateral hippocampal formation projections. *Journal of*  
779 *Comparative Neurology* 302:515–528.
- 780 Van Strien NM, Cappaert NLM, Witter MP (2009) The anatomy of memory: an interactive  
781 overview of the parahippocampal–hippocampal network. *Nat Rev Neurosci* 10:272–282.

- 782 Vazdarjanova A, Guzowski JF (2004) Differences in hippocampal neuronal population responses  
783 to modifications of an environmental context: evidence for distinct, yet complementary,  
784 functions of CA3 and CA1 ensembles. *J Neurosci* 24:6489–6496.
- 785 Vogel JR, Beer B, Clody DE (1971) A simple and reliable conflict procedure for testing anti-  
786 anxiety agents. *Psychopharm* 21:1–7.
- 787 Weeden CSS, Roberts JM, Kamm AM, Kesner RP (2015) The role of the ventral dentate gyrus in  
788 anxiety-based behaviors. *Neurobiol Learn Mem* 118:143–149.
- 789 Wells CE, Amos DP, Jeewajee A, Douchamps V, Rodgers J, O'Keefe J, Burgess N, Lever C  
790 (2013) Novelty and Anxiolytic Drugs Dissociate Two Components of Hippocampal Theta in  
791 Behaving Rats. *J Neurosci* 33:8650–8667.
- 792 Witter MP (2007) Intrinsic and extrinsic wiring of CA3: indications for connective  
793 heterogeneity. *Learning & Memory* 14:705–713.
- 794 Witter MP, Amaral DG (2004) Hippocampal formation. In: *The rat nervous system*, 3rd ed.  
795 (Paxinos G, ed). London.
- 796 Yadin E, Thomas E, Grishkat HL, Strickland CE (1993) The role of the lateral septum in  
797 anxiolysis. *Physiol Behav* 53:1077–1083.
